# Supplementary material
Source: Springer Nature journal article supplement (https://www.springermedizin.de/resource/supplementary/12883_2013_945_MOESM2_ESM.pdf/9456470)
Supplement: MOESM2 [file 9456470]

**Additional file 2: Excluded studies - pdf**

| <p style="text-align: center;"><b>Author<br/>(Study title)</b></p>                                                                                                                                                             | <p style="text-align: center;"><b>Factors necessitating exclusion</b></p> |
|--------------------------------------------------------------------------------------------------------------------------------------------------------------------------------------------------------------------------------|---------------------------------------------------------------------------|
| <p style="text-align: center;"><b>Ahmadi et al. (2010)</b><br/>The Effects of a Yoga Intervention on Balance, Speed and Endurance of Walking, Fatigue and Quality of Life in People with Multiple Sclerosis</p>                | <p>Yoga intervention. No emphasis on Mindfulness described.</p>           |
| <p style="text-align: center;"><b>Doulatabad et al. (2013)</b><br/>The effects of pranayama, hatha and raja yoga on physical pain and the quality of life of women with multiple sclerosis</p>                                 | <p>Yoga intervention. No full text available.</p>                         |
| <p style="text-align: center;"><b>Garrett et al. (2010)</b><br/>Exercise in the community for people with multiple sclerosis—a follow-up of people with minimal gait impairment</p>                                            | <p>Yoga intervention. No emphasis on Mindfulness described.</p>           |
| <p style="text-align: center;"><b>Garrett et al. (2012)</b><br/>Exercise in the community for people with minimal gait impairment due to MS: an assessor-blind randomized controlled trial</p>                                 | <p>As Garrett et al. (2010). Study elaboration.</p>                       |
| <p style="text-align: center;"><b>Granmayeh et al. (2012)</b><br/>The effects of Mindfulness-based Stress Reduction programme on physical symptoms, quality of life, and mental health in patients with multiple sclerosis</p> | <p>Full paper unavailable in English.</p>                                 |
| <p style="text-align: center;"><b>Hankin (2010)</b><br/>Mindfulness based stress reduction in couples facing multiple sclerosis: Impact on self reported anxiety and uncertainty</p>                                           | <p>Uncontrolled trial.</p>                                                |
| <p style="text-align: center;"><b>Jajvandian et al. (2011)</b><br/>Influence of 6-week yoga on depression and fatigue in patients with multiple sclerosis, North Khorasan, northeastern Iran</p>                               | <p>Full paper unavailable in English.</p>                                 |
| <p style="text-align: center;"><b>Nordin et al. (2012)</b><br/>Cognitive behavioural therapy in multiple sclerosis: a randomized controlled pilot study of acceptance and commitment therapy</p>                               | <p>Acceptance and Commitment Intervention.</p>                            |
| <p style="text-align: center;"><b>Oken et al. (2004)</b><br/>Randomized controlled trial of yoga and exercise in multiple sclerosis</p>                                                                                        | <p>Yoga intervention. No emphasis on Mindfulness described.</p>           |
| <p style="text-align: center;"><b>Pritchard et al. (2010)</b><br/>Impact of Integrative Restoration (iRest) Meditation on Perceived Stress Levels in Multiple Sclerosis and Cancer Outpatients</p>                             | <p>Yoga intervention. No emphasis on Mindfulness described.</p>           |
| <p style="text-align: center;"><b>Velikonja et al. (2010)</b><br/>Influence of sports climbing and yoga on spasticity, cognitive function, mood and fatigue in patients with multiple sclerosis</p>                            | <p>Yoga intervention. No emphasis on Mindfulness described.</p>           |
